# Supplementary material for: On-chip integration of a metal–organic framework nanomaterial on a SiO2 waveguide for sensitive VOC sensing
Source: Royal Society of Chemistry journal article supplement (doi:10.1039/d1lc00503k), 2021-01-01
Supplement: d1lc00503k1.pdf [file d1lc00503k1.pdf]

*Supplementary Information for*

## On-chip integration of metal-organic framework nanomaterial on $\text{SiO}_2$ waveguide for sensitive VOC sensing

Xiaoxia Ma<sup>a†</sup>, Jieyun Wu<sup>a†\*</sup>, Lianzhong Jiang<sup>a</sup>, Mengke Wang<sup>a</sup>, Guowei Deng<sup>b</sup>, Shiwei Qu<sup>c</sup>, Kaixin Chen<sup>a\*</sup>

<sup>a</sup> School of Optoelectronic Science and Engineering, Key Lab of Optical Fiber Sensing and Communication (Ministry of Education), University of Electronic Science and Technology of China, Chengdu, 611731, China. E-mail: jieyunwu@uestc.edu.cn; [chenkx@uestc.edu.cn](mailto:chenkx@uestc.edu.cn)

<sup>b</sup> College of Chemistry and Life Science, Sichuan Provincial Key Laboratory for Structural Optimization and Application of Functional Molecules, Chengdu Normal University, Chengdu, 611130, China

<sup>c</sup> School of Electrical Science and Engineering, University of Electronic Science and Technology of China, Chengdu, 611731, China.

† X. Ma and J. Wu contributed equally to this work

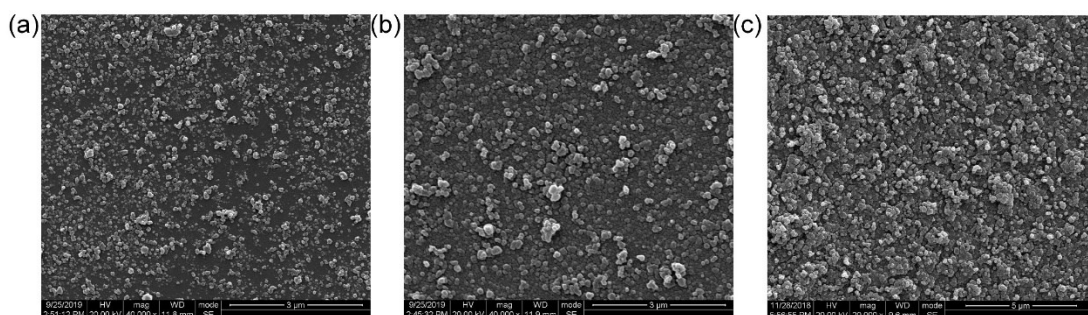

Fig. S1 SEM of ZIF-8 on silicon dioxide substrate. (a) 2 cycles; (b) 4 cycles; (c) 8 cycles.

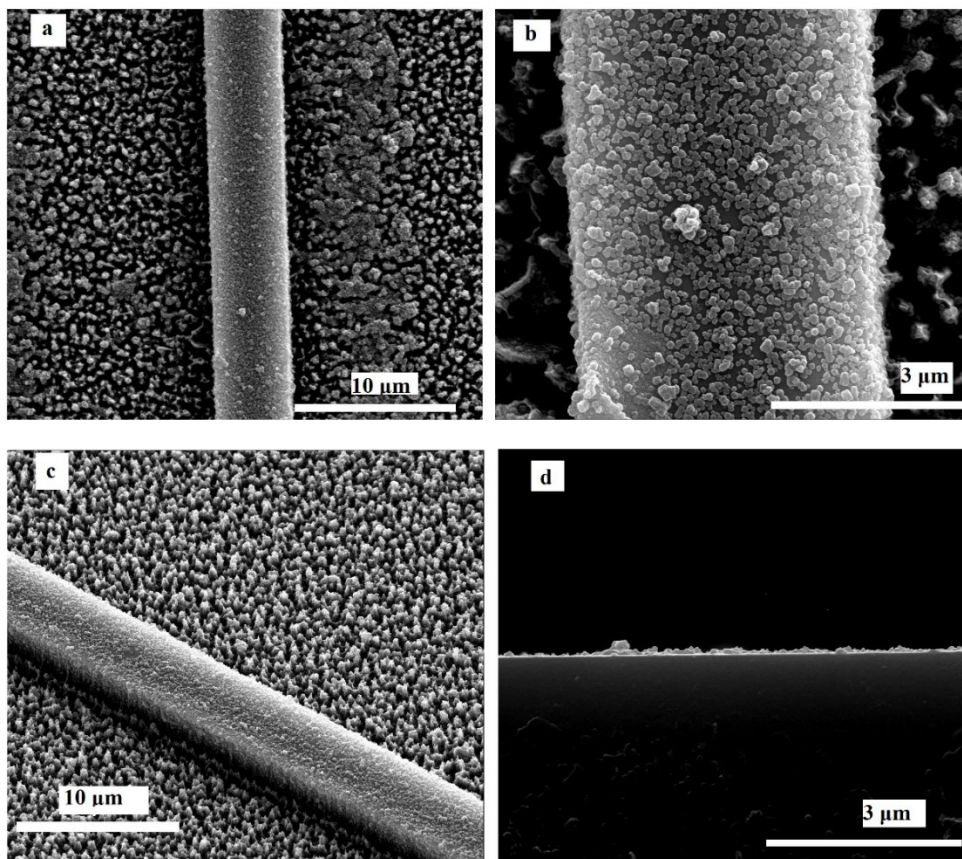

Fig. S2 Surface morphology of strip waveguide (using etching recipe-1) after 8 cycles of ZIF-8 self-assembly

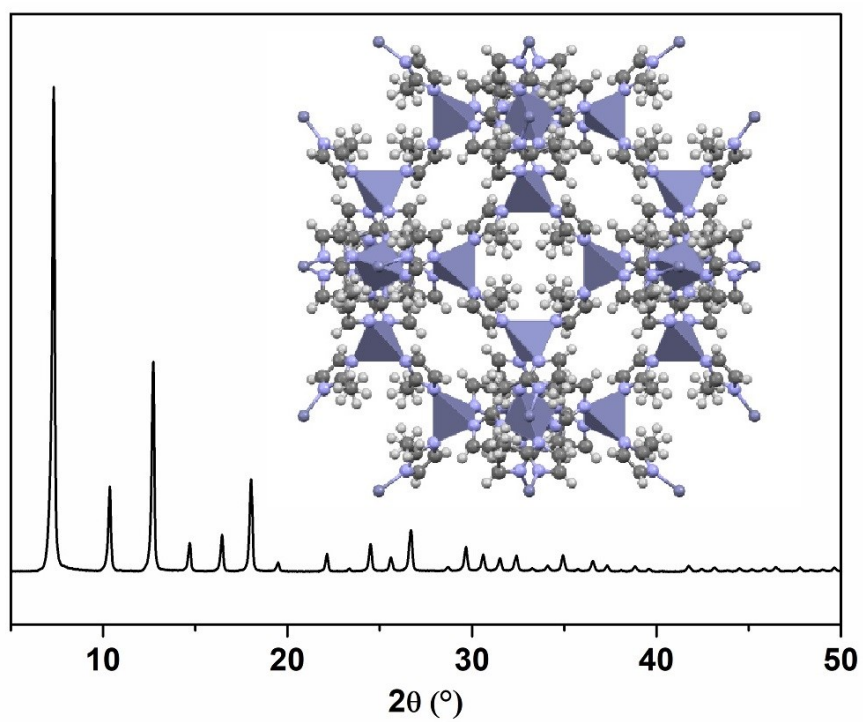

Fig. S3 Powder XRD of ZIF-8 (inset: three-dimensional configuration of ZIF-8)
